# Supplementary material for: Study on Nuclear Magnetic Resonance Logging T2 Spectrum Shape Correction of Sandstone Reservoirs in Oil-Based Mud Wells
Source: MDPI journal article supplement (doi:10.3390/molecules26196082), 2021-10-08
Supplement: s1 [file s1]

# Study on Nuclear Magnetic Resonance Logging $T_2$ Spectrum Shape Correction of Sandstone Reservoirs in Oil-Based Mud Wells

Jianmeng Sun <sup>1,2</sup>, Jun Cai <sup>3</sup>, Ping Feng <sup>2,\*</sup>, Fujing Sun <sup>2</sup>, Jun Li <sup>1</sup>, Jing Lu <sup>1</sup> and Weichao Yan <sup>2</sup>

<sup>1</sup> State Energy Center for Shale Oil Research and Development., Beijing 100083, China; sunjm@upc.edu.cn (J.S.), lujing.syky@sinopec.com (J.L.), lijun67.syky@sinopec.com (J.L.),

<sup>2</sup> School of Geosciences, China University of Petroleum (East China), Qingdao 266580, China; sunjm@upc.edu.cn (J.S.), b20010072@upc.edu.cn (F.S.), yanweichaoqz@163.com (W.Y.)

<sup>3</sup> Shanghai Branch of CNOOC Ltd., Shanghai 200030, China; caijun@cnooc.com.cn

\* Correspondence: upcfengping@163.com; Tel.: +86-17863960551

**Table S1.** The value of the coefficient and constant matrix used in the first type of rock in the calibration process.

| ai1         | ai2          | ai3          | ai4          | ai5          | bi           |
|-------------|--------------|--------------|--------------|--------------|--------------|
| 0.365752347 | 0.858019712  | 0.229512726  | -0.460149893 | -0.1841621   | -0.176871749 |
| 0.598988833 | 0.70840873   | 0.747297003  | 0.133509884  | -0.632480086 | 0.499190336  |
| 0.838000525 | 0.205955701  | 1.208608981  | 1.030337093  | -1.091720355 | 1.34206528   |
| 1.047085388 | -0.427302763 | 1.327616727  | 1.737164207  | -1.310274278 | 1.88579423   |
| 1.195704473 | -0.932418078 | 1.003644873  | 1.923045067  | -1.183229711 | 1.865350647  |
| 1.260158663 | -1.141404299 | 0.36351085   | 1.589611499  | -0.804850318 | 1.343354934  |
| 1.230596487 | -1.025009002 | -0.332870094 | 0.965429012  | -0.360331652 | 0.593650954  |
| 1.117536554 | -0.674399523 | -0.835768881 | 0.320070135  | -0.008267836 | -0.08814093  |
| 0.95355296  | -0.236850109 | -1.009644881 | -0.175421938 | 0.18196112   | -0.523951831 |
| 0.78368456  | 0.133792074  | -0.871278734 | -0.452265296 | 0.197268835  | -0.673451464 |
| 0.567719065 | 0.407217492  | -0.567708534 | -0.350440794 | 0.082492446  | -0.494642584 |
| 0.395625278 | 0.573661248  | -0.31215732  | -0.170705683 | -0.040900636 | -0.287373489 |
| 0.29079817  | 0.584507995  | -0.120692484 | -0.05776005  | -0.10965797  | -0.145802839 |
| 0.220905419 | 0.457347022  | 0.00749889   | 0.015857703  | -0.127625848 | -0.046324037 |
| 0.15039618  | 0.300110668  | 0.074570829  | 0.06074228   | -0.11168876  | 0.022219195  |
| 0.07837835  | 0.136358287  | 0.060897744  | 0.056540727  | -0.066502532 | 0.036591808  |
| 0.006183281 | -0.028771969 | -0.017730498 | 0.009630838  | -0.002415313 | 0.001949996  |

**Table S2.** The value of the coefficient and constant matrix used in the second type of rock in the calibration process.

| ai1         | ai2          | ai3          | ai4          | ai5          | bi           |
|-------------|--------------|--------------|--------------|--------------|--------------|
| 0.732733057 | -0.308415271 | -0.562361701 | -0.439306724 | -0.305373059 | -0.522524694 |

|              |              |              |              |              |              |
|--------------|--------------|--------------|--------------|--------------|--------------|
| 0.828359794  | -0.278931109 | -0.689936033 | -0.168413809 | -0.10377057  | -0.61146651  |
| 0.902233561  | -0.30532734  | -0.681862616 | 0.33661311   | 0.246771659  | -0.568592161 |
| 0.997650126  | -0.453029403 | -0.532194658 | 0.839711891  | 0.542813274  | -0.426203352 |
| 1.129675347  | -0.655129677 | -0.264650177 | 1.073901323  | 0.597120427  | -0.249403818 |
| 1.264192136  | -0.707153404 | 0.039340959  | 0.912655641  | 0.32326474   | -0.081785476 |
| 1.333837149  | -0.4769639   | 0.308549668  | 0.405288788  | -0.164845429 | 0.023404922  |
| 1.281394908  | -0.014779373 | 0.470979075  | -0.214663946 | -0.651561702 | 0.050278634  |
| 1.09378232   | 0.448592463  | 0.472710623  | -0.640001265 | -0.930492025 | 0.025743904  |
| 0.810308772  | 0.647182047  | 0.31378466   | -0.675194647 | -0.900687962 | -0.000220232 |
| 0.502331388  | 0.478895639  | 0.136550804  | -0.512288908 | -0.598608024 | -0.00845916  |
| 0.260940919  | 0.086096601  | 0.004338431  | -0.319646427 | -0.256871226 | 0.00303875   |
| 0.074327173  | -0.129307844 | -0.030534874 | -0.085025852 | 0.012711052  | 0.105820445  |
| -0.038298226 | -0.099155406 | 0.008631921  | 0.09176313   | 0.141612906  | 0.215527968  |
| -0.071198275 | 0.012876782  | 0.057838958  | 0.127419155  | 0.17070866   | 0.205491446  |
| -0.05021581  | 0.041959142  | 0.057941864  | 0.0814442    | 0.113422014  | 0.120976933  |
| -0.002389307 | 0.020466674  | 0.038832504  | -0.006891351 | 0.00265519   | -0.009771921 |

**Table S3.** The value of the coefficient and constant matrix used in the third type of rock in the calibration process.

| ai1          | ai2          | ai3          | ai4          | ai5          | bi           |
|--------------|--------------|--------------|--------------|--------------|--------------|
| 0.538048146  | 1.220847825  | -0.363662739 | 0.357904722  | 0.070452603  | -0.512262961 |
| 0.620606386  | 0.820909322  | -0.165371292 | 0.136170798  | 0.21089004   | -0.530971577 |
| 0.700597386  | 0.298198043  | 0.079991733  | -0.051379413 | 0.381192447  | -0.497945127 |
| 0.757881655  | -0.158463133 | 0.310505619  | -0.120652126 | 0.547307661  | -0.356877069 |
| 0.759021661  | -0.499692616 | 0.529912929  | -0.022734719 | 0.710936337  | -0.014155543 |
| 0.713179493  | -0.654869286 | 0.658471291  | 0.171336085  | 0.794518594  | 0.393831086  |
| 0.629647607  | -0.67601986  | 0.668690627  | 0.348640871  | 0.771720599  | 0.726501065  |
| 0.524099608  | -0.657051822 | 0.575292971  | 0.411834955  | 0.653597041  | 0.872564735  |
| 0.414345537  | -0.666397502 | 0.425756471  | 0.326920408  | 0.489469458  | 0.788898073  |
| 0.314156967  | -0.748638702 | 0.287939592  | 0.131437167  | 0.366728079  | 0.521223539  |
| 0.196088916  | -0.712011031 | 0.212181302  | 0.006844433  | 0.323048994  | 0.236632148  |
| 0.140994103  | -0.622963918 | 0.106984716  | -0.076521121 | 0.216411515  | -0.016731354 |
| 0.129565371  | -0.392849974 | -0.025511549 | -0.131320071 | 0.052248034  | -0.170601259 |
| 0.14102767   | -0.171978612 | -0.135946769 | -0.168064351 | -0.118219433 | -0.223202062 |
| 0.130973189  | -0.049957972 | -0.159289035 | -0.144412714 | -0.192471423 | -0.195049904 |
| 0.078566374  | 0.040946699  | -0.120001026 | -0.048201625 | -0.153474684 | -0.106199889 |
| -0.006780582 | 0.095210475  | -0.024914475 | 0.072282708  | -0.026695097 | 0.026770292  |

**Table S4.** The value of the coefficient and constant matrix used in the fourth type of rock in the calibration process.

| ai1 | ai2 | ai3 | ai4 | ai5 | bi |
|-----|-----|-----|-----|-----|----|
|-----|-----|-----|-----|-----|----|

|              |              |              |              |              |              |
|--------------|--------------|--------------|--------------|--------------|--------------|
| 0.445472406  | 0.115348867  | 0.312876307  | 0.298375076  | 0.461635184  | 1.373136171  |
| 0.447366732  | 0.253111398  | 0.276543012  | 0.546833767  | 0.516466185  | 1.218225784  |
| 0.415640046  | 0.428887161  | 0.25496218   | 0.828208999  | 0.549649994  | 1.102356837  |
| 0.344230461  | 0.583551258  | 0.278282407  | 1.14783261   | 0.571914642  | 1.167497689  |
| 0.256475545  | 0.581258252  | 0.336797714  | 1.441385085  | 0.615156127  | 1.378214339  |
| 0.183562831  | 0.306672884  | 0.488979121  | 1.515117841  | 0.724570148  | 1.555483979  |
| 0.135759046  | -0.04962297  | 0.617852148  | 1.35129623   | 0.762860786  | 1.661939717  |
| 0.108620537  | -0.28023677  | 0.599191799  | 1.045409563  | 0.688063405  | 1.591781143  |
| 0.096151316  | -0.303560322 | 0.428464734  | 0.691952537  | 0.499153568  | 1.28929903   |
| 0.086455658  | -0.221767819 | 0.222762612  | 0.389982067  | 0.232394805  | 0.866585608  |
| 0.076217534  | -0.180463224 | 0.095123174  | 0.15304516   | 0.042960974  | 0.421799014  |
| 0.070538847  | -0.151337942 | 0.039959101  | -0.023370042 | -0.062323576 | 0.061512823  |
| 0.083175598  | -0.157108991 | -0.010413104 | -0.119734253 | -0.077216844 | -0.186473867 |
| 0.101412696  | -0.191404598 | -0.037768275 | -0.178938184 | -0.03465123  | -0.323113776 |
| 0.097109037  | -0.162233272 | -0.036572532 | -0.193481543 | -0.015655505 | -0.31935693  |
| 0.063787346  | -0.078827545 | -0.011671852 | -0.143184062 | 0.008097792  | -0.221217406 |
| -0.005017022 | 0.077338286  | 0.031840168  | -0.010114646 | 0.032724194  | -0.036100768 |
